# Supplementary material for: Alumina-coated graphene sheet hybrids for electrically insulating polymer composites with high thermal conductivity
Source: Royal Society of Chemistry journal article supplement (doi:10.1039/c3ra42104j), 2013-01-01
Supplement: c3ra42104j.pdf [file c3ra42104j.pdf]

## SUPPORTING INFORMATION

# Alumina-Coated Graphene Sheet Hybrids for Electrically Insulating Polymer Composites with High Thermal Conductivity

Rong Qian<sup>†</sup>, Jinhong Yu<sup>‡§\*</sup>, Chao Wu<sup>†</sup>, Xing Zhai<sup>†</sup>, Pingkai Jiang<sup>†\*</sup>

<sup>†</sup>Department of Polymer Science and Engineering and Shanghai Key Lab of Electrical Insulation and Thermal Aging, Shanghai Jiao Tong University, Shanghai 200240, China;

<sup>‡</sup> Ningbo Institute of Material Technology & Engineering, Chinese Academy of Sciences, Ningbo, 315201, China.

<sup>§</sup> Key Laboratory of New Processing Technology for Nonferrous Metals and Materials, Ministry of Education, Guilin University of Technology, Guilin 541004, China;

\*Corresponding author, Electronic mail: [yujinhong@glut.edu.cn](mailto:yujinhong@glut.edu.cn); [pkjiang@sjtu.edu.cn](mailto:pkjiang@sjtu.edu.cn)

## SUPPLEMENT

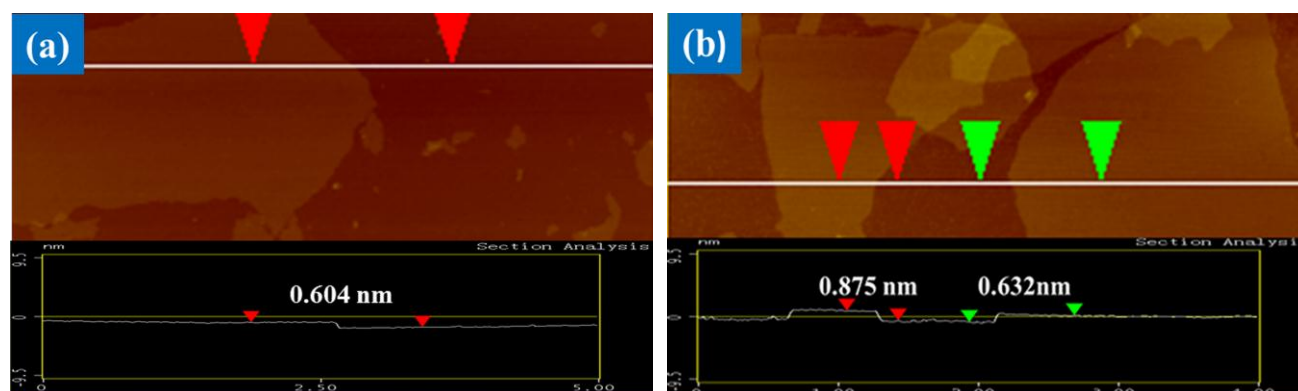

**Figure S1.** AFM images of: (a) GS and (b) GO.

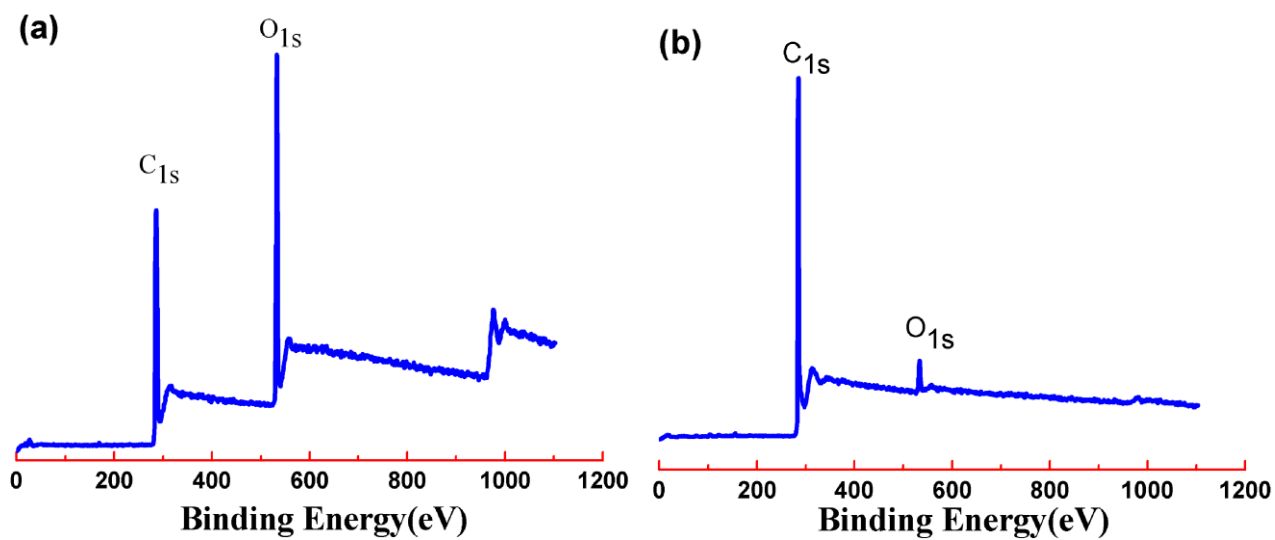

**Figure S2** XPS survey spectra of (a) GO and (b) GS.

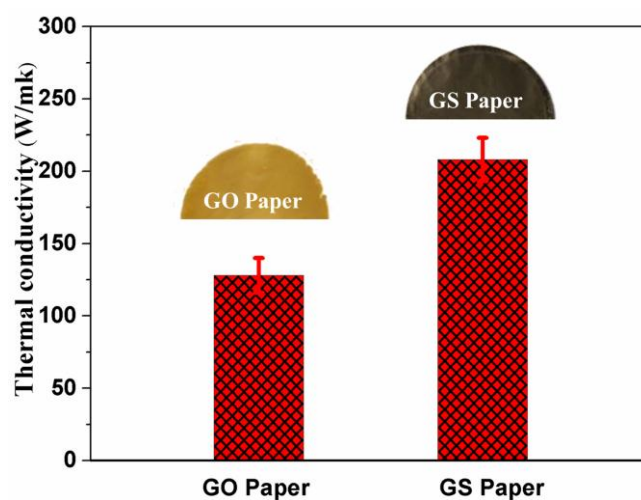

**Figure S3.** thermal conductivities of GO paper and GS paper.

**Table S1.** thermal conductivities of the composites by previous researchers.

| <b>Group</b>         | <b>Journal(year)</b>                                | <b>Filler</b>                                                                             | <b>Matrix</b> | <b>Thermal conductivity</b> |
|----------------------|-----------------------------------------------------|-------------------------------------------------------------------------------------------|---------------|-----------------------------|
| J. Kim et al.        | J. Nanopart. Res.<br>(2012)                         | Al(OH) <sub>3</sub> -coated GO<br>(10 wt%) and Al <sub>2</sub> O <sub>3</sub><br>(80 wt%) | Epoxy         | 3.2 W/m•K                   |
| C.C. M. Ma<br>et al. | Nanoscale<br>(2013)                                 | TRGO-silica<br>(1 wt%)                                                                    | Epoxy         | 0.322 W/m•K                 |
| J.H. Yu et al.       | Polym. Chem.<br>(2011)                              | Al <sub>2</sub> O <sub>3</sub><br>(20 wt%)                                                | Epoxy         | 0.399 W/m•K                 |
| J.H. Yu et al.       | IEEE Trans.<br>Dielectric. Electr.<br>Insul. (2011) | Graphene<br>(10 wt%)                                                                      | PVDF          | 0.56 W/m•K                  |
| This paper           |                                                     | Al <sub>2</sub> O <sub>3</sub> -coated GS<br>(40 wt%)                                     | PVDF          | 0.586 W/m•K                 |
